# Supplementary material for: Silver nanoparticles deposited on graphene oxide for ultrasensitive surface-enhanced Raman scattering immunoassay of cancer biomarker
Source: Royal Society of Chemistry journal article supplement (doi:10.1039/c8nr02820f), 2018-01-01
Supplement: c8nr02820f1.pdf [file c8nr02820f1.pdf]

## Supporting Information

*for*

# Silver Nanoparticles Deposited Graphene Oxide for Ultrasensitive Surface-Enhanced Raman Scattering Immunoassay of Cancer Biomarker

Lin Yang,<sup>a</sup> Shu Jun Zhen,<sup>\*b</sup> Yuan Fang Li<sup>b</sup> and Cheng Zhi Huang<sup>\*a</sup>

<sup>a</sup>Key Laboratory of Luminescence and Real-Time Analytical Chemistry (Southwest University), Ministry of Education, College of Pharmaceutical Sciences, Southwest University, Chongqing 400715, P. R. China. E-mail: [chengzhi@swu.edu.cn](mailto:chengzhi@swu.edu.cn); Fax: +86 2368367257; Tel: +86 23 68254659

<sup>b</sup>Chongqing Key Laboratory of Biomedical Analysis (Southwest University), Chongqing Science & Technology Commission, College of Chemistry and Chemical Engineering, Southwest University, Chongqing 400715, P. R. China. E-mail: [zsj@swu.edu.cn](mailto:zsj@swu.edu.cn); Fax: +86 2368367257; Tel: +86 23 68254059

S1 The mechanism of the glucose oxidase assisted silver dissolution of the new Surface-Enhanced Raman Scattering immunoassay.

Control experiments indicated that AgNPs on the GO can be dissolved by H<sub>2</sub>O<sub>2</sub>, which displayed a significant GO SERS signal change as shown in Figure S1. No appreciable SERS signal change was obtained in the absence of GOx, glucose or H<sub>2</sub>O<sub>2</sub>. This indicated that AgNPs dissolved was attributed to the enzyme-mediated generation of H<sub>2</sub>O<sub>2</sub>.

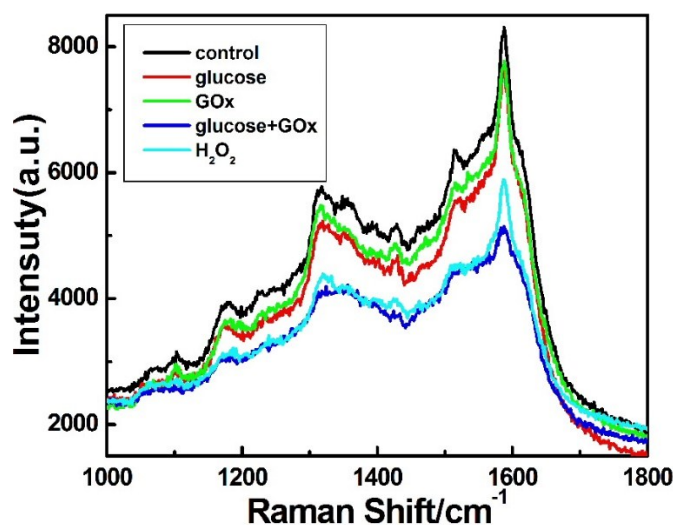

Figure S1. SERS signals change of the control experiments of the glucose oxidase assisted silver dissolution of the new Surface-Enhanced Raman Scattering immunoassay.

S2 Dissolution of AgNPs on the GO with different concentration of GOx.

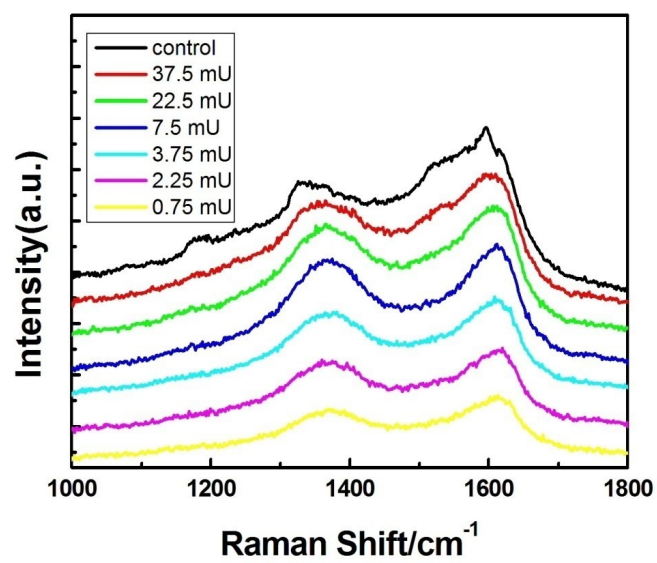

Figure S2. Raman spectra of GO in the absence and presence of different concentration of GOx.

S3 The influence parameters for the glucose oxidase assisted silver dissolution of the new Surface-Enhanced Raman Scattering immunoassay.

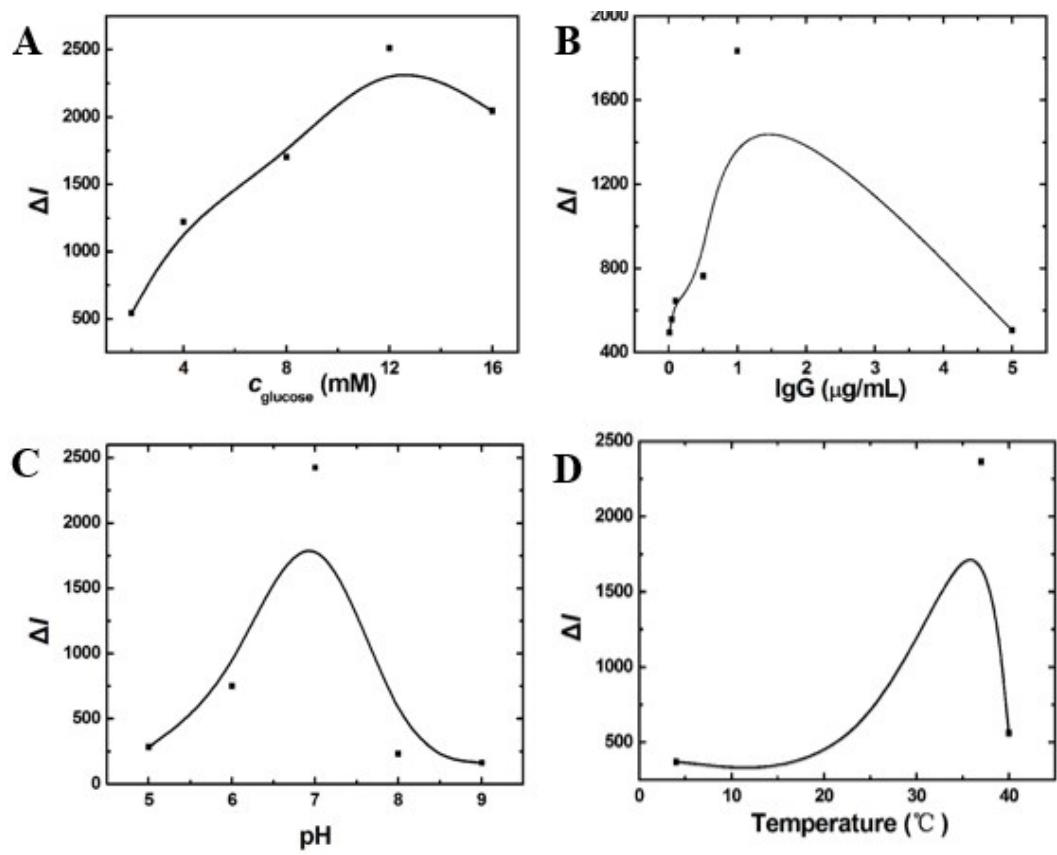

Figure S3. The effects of (A) glucose concentration, (B) IgG concentration, (C) pH, (D) reaction temperature.

S4 The original SERS spectra of the serum samples.

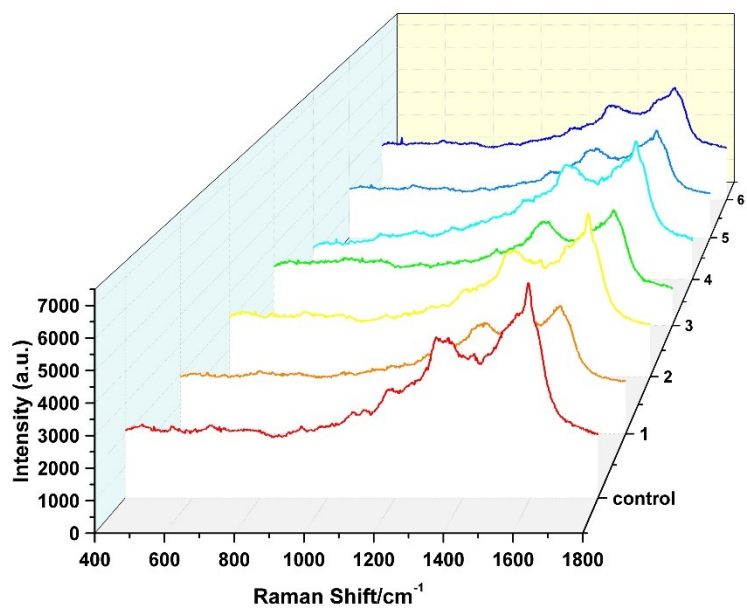

Figure S4. The original SERS spectra of the serum samples.

### Comparison with other immunoassay proposed in literatures.

**Table S1. Comparison of the Developed Immunoassay with Others in the Detection of PSA**

| Immunoassay method       | Detection range<br>(ng/mL) | Detection limit<br>(ng/mL) | Reference |
|--------------------------|----------------------------|----------------------------|-----------|
| SERS assay               | 0.05-200                   | 0.05                       | 1         |
| Colorimetric assay       | 0.05-20                    | 0.03                       | 2         |
| Colorimetric assay       | 0-10                       | 4                          | 3         |
| Fluoroimmunoassay        | 0-128                      | 0.33                       | 4         |
| light scattering assay   | 0.05-10                    | 0.02                       | 5         |
| light scattering assay   | 1-20                       | 1                          | 6         |
| Electrochemiluminescence | 1.4-70                     | 3.5                        | 7         |
| Electrochemical assay    | 0.14-1400                  | 0.14                       | 8         |
| Electrochemical assay    | 0.01-10                    | 0.006                      | 9         |
| SERS immunoassay         | $5 \times 10^{-4}$ -0.5    | $2.3 \times 10^{-4}$       | this work |

### REFERENCE

- (1) Gao, R.; Cheng, Z.; deMello, A. J.; Choo, J. *Lab Chip*, 2016, **16**, 1022-1029.
- (2) Gao, Z.; Xu, M.; Hou, L.; Chen, G.; Tang, D. *Anal. Chem.*, 2013, **85**, 6945-6952.
- (3) Yang, Y.-C.; Tseng, W.-L. *Anal. Chem.*, 2016, **88**, 5355-5362.
- (4) Li, X.; Li, W.; Yang, Q.; Gong, X.; Guo, W.; Dong, C.; Liu, J.; Xuan, L.; Chang, J. *ACS Appl. Mater. Interfaces*, 2014, **6**, 6406-6414.
- (5) Vial, S.; Wenger, J. *Analyst*, 2017, **142**, 3484-3491.
- (6) Wu, X.; Li, T.; Tao, G.; Lin, R.; Pei, X.; Liu, F.; Li, N. *Analyst*, 2017, **142**, 4201-4205.
- (7) Wu, M.-S.; Yuan, D.-J.; Xu, J.-J.; Chen, H.-Y. *Chem. Sci.*, 2013, **4**, 1182-1188.
- (8) Liu, J.; Lu, C.-Y.; Zhou, H.; Xu, J.-J.; Wang, Z.-H.; Chen, H.-Y. *Chem. Commun.*, 2013, **49**, 6602-6604.
- (9) Wu, D.; Li, R.; Wang, H.; Liu, S.; Wang, H.; Wei, Q.; Du, B. *Analyst*, 2012, **137**, 608-613.
